# Supplementary material for: Multicomponent crystals of anti-tuberculosis drugs: a mini-review
Source: Royal Society of Chemistry journal article supplement (doi:10.1039/d0ra06478e), 2020-01-01
Supplement: d0ra06478e1.pdf [file d0ra06478e1.pdf]

## SUPPLEMENTARY MATERIAL

### Multicomponent crystals of anti-Tuberculosis drugs: A mini-review

Eustina Batisai

University of Venda, Department of Chemistry, P. Bag X5050, Thohoyandou, 0920, South Africa

[Eustina.Batisai@univen.ac.za](mailto:Eustina.Batisai@univen.ac.za)

**Table S1** Co-crystal formers, CCDC ref codes, common synthons and physical properties addressed for multicomponent crystals of isoniazid.

| Co-crystal former                                                        | CCDC ref code                | Physical property addressed                |
|--------------------------------------------------------------------------|------------------------------|--------------------------------------------|
| 4-cyanobenzoic acid                                                      | ACUDAG <sup>1,a,b,d</sup>    | -                                          |
| p-aminobenzoic acid                                                      | ACUDEK <sup>1,a,c</sup>      | -                                          |
| p-aminobenzoic acid                                                      | ACUDEK01 <sup>1,a,c,f</sup>  | -                                          |
| 4-nitrobenzoic acid                                                      | ACUDIO <sup>1,a,b,d</sup>    | -                                          |
| Nicotinamide<br>Succinic acid                                            | BICQAH <sup>2,a,f</sup>      | Solubility and dissolution rate            |
| Nicotinamide<br>Fumaric acid                                             | BICQEL <sup>2,a,f</sup>      | Solubility and dissolution rate            |
| 4-hydroxybenzoic acid                                                    | BICQUB <sup>2,a,b</sup>      | Solubility and dissolution rate            |
| 4-hydroxybenzoic acid                                                    | BICQUB01 <sup>2,a,f</sup>    | Solubility and dissolution rate            |
| 2,2'-dithiodibenzoic acid                                                | BIZMAZ <sup>3,a,c,e</sup>    | -                                          |
| 18-crown-6                                                               | BIZMUU <sup>4</sup>          | -                                          |
| 2,3-dihydroxybenzoic acid                                                | BOMBOW <sup>5,a,b</sup>      | -                                          |
| 3,5-dihydroxybenzoic acid                                                | BOMBUC <sup>5,f</sup>        | -                                          |
| 3-hydroxybenzoic acid                                                    | BOMCAJ <sup>5,a</sup>        | -                                          |
| DL Tartaric acid                                                         | BOPHOG <sup>6</sup>          | -                                          |
| 4-hydroxy-3,5-dimethoxybenzoic acid                                      | COSKUT <sup>7,e</sup>        | Solubility and dissolution rate.           |
| 6-chloro-3,4-dihydro-2H-1,2,4-benzothiadiazine-7-sulfonamide 1,1-dioxide | DADLUS <sup>8,e</sup>        | Solubility and dissolution rate            |
| 3-,4-hydroxybenzoic acid                                                 | EJOYEJ <sup>9,a,b</sup>      | Solubility and stability                   |
| Malonic acid                                                             | FADGEY <sup>10,a</sup>       | -                                          |
| Succinic acid                                                            | FADGIC <sup>10,a,b,d</sup>   | -                                          |
| Succinic acid                                                            | FADGIC01 <sup>11,c,d,e</sup> | -                                          |
| Succinic acid                                                            | FADGIC02 <sup>12,a,d</sup>   | Solubility, stability and dissolution rate |
| Succinic acid                                                            | FADGIC03 <sup>7,a,b,d</sup>  | -                                          |
| Glutaric acid                                                            | FADGOI <sup>10,a,c</sup>     | -                                          |
| Adipic acid                                                              | FADGUO <sup>10,a,b,f</sup>   | -                                          |
| Adipic acid                                                              | FADGUO01 <sup>13,a</sup>     | -                                          |
| Adipic acid                                                              | FADGUO02 <sup>7,a,b,f</sup>  | Solubility                                 |
| Pimelic acid                                                             | FADHAV <sup>10,a,c</sup>     | -                                          |
| 4-hydroxybenzoic acid                                                    | FADHEZ <sup>10,a,c</sup>     | -                                          |
| 4-hydroxybenzoic acid                                                    | FADHEZ01 <sup>10</sup>       | -                                          |
| 2,4-hydroxybenzoic acid                                                  | FADHID <sup>10,a,c,f</sup>   | -                                          |
| Ferulic acid                                                             | FOSFIE <sup>14,d</sup>       | Stability                                  |
| Resorcinol                                                               | FOSFOK <sup>14,c</sup>       | Stability                                  |
| Vanillic acid                                                            | FOSFUQ <sup>14,d</sup>       | Stability                                  |

|                                                                    |                              |                                                   |
|--------------------------------------------------------------------|------------------------------|---------------------------------------------------|
| Vanillic acid                                                      | FOSFUQ01 <sup>14,a,c</sup>   | Stability                                         |
| Caffeic acid                                                       | FOSMIL <sup>14,a</sup>       | Stability                                         |
| Caffeic acid                                                       | FOSMIL01 <sup>14,a,b</sup>   | Stability                                         |
| 4-t-butylbenzoic acid                                              | GIYLUY <sup>15,a,d</sup>     | -                                                 |
| Salicylic acid                                                     | LATKUO <sup>11,a,f</sup>     | -                                                 |
| 2-chloro-4-nitrobenzoic acid                                       | LATLEZ <sup>11,a,d,e</sup>   | -                                                 |
| Fumaric acid                                                       | LATSUW <sup>12</sup>         | Solubility and dissolution rate                   |
| Fumaric acid                                                       | LATTAD <sup>12,a</sup>       | Solubility and dissolution rate                   |
| Fumaric acid                                                       | LATTAD01 <sup>2,a,b</sup>    | Stability, solubility and dissolution rate        |
| Fumaric acid                                                       | LATTAD02 <sup>2,a</sup>      | Stability, solubility and dissolution rate        |
| 3,4,5-trihydroxybenzoic acid                                       | LODHIX <sup>16</sup>         | -                                                 |
| 3,4,5-trihydroxybenzoic acid                                       | LODHIX01 <sup>16</sup>       | -                                                 |
| 3,4,5-trihydroxybenzoic acid                                       | LODHOD <sup>16,a,b</sup>     | -                                                 |
| 3,4,5-trihydroxybenzoic acid                                       | LODHOD01 <sup>16,a</sup>     | -                                                 |
| 3,4,5-trihydroxybenzoic acid                                       | LODHOD02 <sup>5,a,b</sup>    | -                                                 |
| 3,4,5-trihydroxybenzoic acid                                       | LODHOD03 <sup>17,a,b</sup>   | -                                                 |
| 2,6-dihydroxybenzoic acid                                          | NAKZEH <sup>18</sup>         | -                                                 |
| 2,6-dihydroxybenzoic acid                                          | NAKZEH01 <sup>17</sup>       | -                                                 |
| Phthalic acid                                                      | NAKZOR <sup>18,d</sup>       | -                                                 |
| Terephthalic acid                                                  | ORAWIO <sup>19,a,b,f</sup>   | -                                                 |
| 3-(4-hydroxyphenyl)acrylic acid                                    | PEHFUF <sup>20</sup>         | -                                                 |
| 2,4,6-trinitrophenol                                               | PEZVAU*                      |                                                   |
| 5-fluorocytosine                                                   | PINJIJ <sup>21,f</sup>       | Stability and solubility                          |
| Oxalic acid                                                        | QICJIY <sup>22</sup>         | Solubility                                        |
| Oxalic acid                                                        | QICJIY01*                    | -                                                 |
| Maleic acid                                                        | QICJOE <sup>22</sup>         | Solubility                                        |
| Methane sulfonic acid                                              | QICJUK <sup>22</sup>         | Solubility                                        |
| Benzoic acid                                                       | SETRIU <sup>23,a,b,f</sup>   | Stability and solubility                          |
| Sebacic acid                                                       | SETROA <sup>23,a,b,d</sup>   | Stability and solubility                          |
| Suberic acid                                                       | SETRUG <sup>23,a,b,d</sup>   | Stability and solubility                          |
| Cinnamic acid                                                      | SETSAN <sup>23,a,b</sup>     | Stability and solubility                          |
| Cinnamic acid                                                      | SESTAN01 <sup>23,a,b</sup>   | Stability and solubility                          |
| Cinnamic acid                                                      | SESTAN02 <sup>23,a,b,f</sup> | Stability and solubility                          |
| 5,7-dihydroxy-2-(4-hydroxyphenyl)-2,3dihydro-4H-1-benzopyran-4-one | UDUJIP*.c                    |                                                   |
| 4-aminosalicylic acid                                              | URUDER <sup>24,a,f</sup>     | -                                                 |
| 4-aminosalicylic acid                                              | URUDER01 <sup>24,a,f</sup>   | -                                                 |
| 4-aminosalicylic acid                                              | URUDER02 <sup>24,a,f</sup>   | -                                                 |
| 4-aminosalicylic acid                                              | URUDER03 <sup>24,a,f</sup>   | -                                                 |
| 4-aminosalicylic acid                                              | URUDER04 <sup>24,a,f</sup>   | -                                                 |
| 4-aminosalicylic acid                                              | URUDER05 <sup>24,a,b,f</sup> | -                                                 |
| 4-aminosalicylic acid                                              | URUDER06 <sup>24,a,f</sup>   | -                                                 |
| 4-aminosalicylic acid                                              | URUDER07 <sup>24,a,b,f</sup> | -                                                 |
| 4-aminosalicylic acid                                              | URUDER08 <sup>24,a,b,f</sup> | -                                                 |
| 4-aminosalicylic acid                                              | URUDER09 <sup>24,a,b,f</sup> | -                                                 |
| 4-aminosalicylic acid                                              | URUDER10 <sup>24,a,b,f</sup> | -                                                 |
| But-2-ynoic acid                                                   | VAXROD <sup>25</sup>         | -                                                 |
| But-2-ynoic acid                                                   | VAXRUJ <sup>25</sup>         | -                                                 |
| Benzene-1,2,4,5-tetracarboxylic acid                               | VEGHOH <sup>26</sup>         | -                                                 |
| Naphthalene-1,5-disulfonic acid                                    | VEGHUN <sup>26</sup>         | -                                                 |
| Resveratrol                                                        | VOPQEZ <sup>27</sup>         | Solubility                                        |
| Tartaric acid                                                      | WETZAZ*                      | -                                                 |
| Tartaric acid                                                      | WETZAZ01*                    | -                                                 |
| D-tartaric acid                                                    | WETZAZ02 <sup>6</sup>        | -                                                 |
| D-tartaric acid                                                    | WETZAZ03 <sup>6</sup>        | -                                                 |
| Benzene 1,3,5 triol                                                | WIWNAU <sup>17,e</sup>       | -                                                 |
| Fumaric acid                                                       | YEVBAF <sup>28,a</sup>       | Solubility, dissolution and membrane permeability |
| Pyrazinamide                                                       |                              |                                                   |
| 3-carboxy-4-hydroxybenzenesulfonic acid                            | YIFXOB <sup>29</sup>         | -                                                 |
| 3,4-dihydroxycinnamic acid                                         | FOSMIL02 <sup>30,a</sup>     |                                                   |
| 3,4-dihydroxycinnamic acid                                         | FOSMIL03 <sup>30,a</sup>     |                                                   |
| 4-hydroxycinnamic acid                                             | PEHFUF01 <sup>30</sup>       |                                                   |
| 2-hydroxycinnamic acid                                             | PUMFOV <sup>30,a,b</sup>     |                                                   |
| 2,4-dihydroxycinnamic acid                                         | PUMGAI <sup>30</sup>         |                                                   |

|                        |                            |  |
|------------------------|----------------------------|--|
| 3-hydroxycinnamic acid | PUMGOW <sup>30</sup>       |  |
| cinnamic acid          | SETSAN03 <sup>30,a,b</sup> |  |

a = synthon type I, b = synthon type II, c = synthon type III, d = synthon type IV, e = synthon type V, F = synthon type VI.

**Table S2** Co-crystal co-formers, CCDC ref codes, common synthons and physical properties addressed for multicomponent crystals of pyrazinamide.

| Co-crystal former                                                        | CCDC ref code                | Physical property addressed                |
|--------------------------------------------------------------------------|------------------------------|--------------------------------------------|
| 3,5-dihydroxybenzoic acid                                                | ACOPOA <sup>31,j</sup>       | Solubility                                 |
| 3-(4-hydroxy-3-methoxyphenyl)prop-2-enoic acid                           | ACOPUG <sup>31,i,j</sup>     | Solubility                                 |
| p-toluene sulfonic acid                                                  | ACOQAN <sup>31,</sup>        | Solubility                                 |
| 4-nitrobenzamide                                                         | ASAYIC <sup>32,i</sup>       | -                                          |
| 2-Aminobenzoic acid                                                      | EBONUG <sup>33,i,j,k</sup>   | -                                          |
| 6-chloro-3,4-dihydro-2H-1,2,4-benzothiadiazine-7-sulfonamide 1,1-dioxide | EGENIP <sup>34,k</sup>       | Solubility and dissolution                 |
| Hydrochlorothiazide                                                      | EGENIP01 <sup>8,k</sup>      | Solubility and dissolution rate            |
| Hydrochlorothiazide                                                      | EGENIP02 <sup>35,k</sup>     | Solubility                                 |
| benzene-1,2,3-triol                                                      | HEDRAL <sup>36</sup>         | Solubility and dissolution rate            |
| Temozolomide                                                             | KIJSER <sup>37,</sup>        | -                                          |
| Hexanedioic acid                                                         | KOVSAK <sup>38,g,h,j</sup>   | Solubility and dissolution rate            |
| Decanedioic acid                                                         | KOVSEV <sup>38,g,h,i</sup>   | Solubility and dissolution rate.           |
| prop-1-ene-1,2,3-tricarboxylic acid                                      | KOVSIK <sup>38</sup>         | Solubility and dissolution rate            |
| 2-hydroxypropane-1,2,3-tricarboxylate                                    | KOVSOE <sup>38,g</sup>       | Solubility and dissolution rate            |
| fumaric acid                                                             | LATTIL <sup>12,g,h,i</sup>   | Solubility and dissolution rate            |
| succinic acid                                                            | LATTOR <sup>12,g,h,i</sup>   | Solubility and dissolution rate            |
| succinic acid                                                            | LATTOR01 <sup>39,g,h,i</sup> | Solubility and dissolution rate            |
| 4-nitrobenzoic acid                                                      | MUDVUE <sup>40,g,i,j</sup>   | Solubility                                 |
| 2,4-dihydroxybenzoic acid                                                | NEFFEM <sup>41,j</sup>       | -                                          |
| 2,4-dihydroxybenzoic acid                                                | NEFFEM01 <sup>31,j</sup>     | Solubility                                 |
| 2,6-dihydroxybenzoic acid                                                | NEFGEN <sup>41</sup>         | -                                          |
| 2,6-dihydroxybenzoic acid                                                | NEFGEN01 <sup>31,g</sup>     | Solubility                                 |
| 2,3-dihydroxybenzoic acid                                                | NEFGIR <sup>41</sup>         | -                                          |
| $\beta$ -Cyclodextrin                                                    | NUFVEQ <sup>42</sup>         | -                                          |
| 3,4-dihydroxybenzoic acid                                                | NUSMIZ <sup>43</sup>         | -                                          |
| 4-hydroxybenzoic acid                                                    | NUVFIV <sup>43,i</sup>       | -                                          |
| 4-hydroxybenzoic acid                                                    | NUVFIV01 <sup>44,i</sup>     | -                                          |
| 3-hydroxybenzoic acid                                                    | NUVFOB <sup>43</sup>         | -                                          |
| 3,4-dihydroxycyclobut-3-ene-1,2-dione                                    | PAQNOM <sup>45,g,h</sup>     | -                                          |
| theophylline                                                             | RACFIN <sup>46,i</sup>       | -                                          |
| theophylline                                                             | RACFIN01 <sup>46,i,g</sup>   | -                                          |
| 4-Hydroxy-3-methoxybenzoic acid                                          | REBXED <sup>47,i,j</sup>     | Solubility                                 |
| 3,4,5-Trihydroxybenzoic acid                                             | REBXIH <sup>47,i</sup>       | Solubility                                 |
| 1-Hydroxy-2-naphthoic acid                                               | REBXON <sup>47,g,h,i</sup>   | Solubility                                 |
| 1H-Indole-2-carboxylic acid                                              | REBXUT <sup>47</sup>         | Solubility                                 |
| Hydrochloric acid                                                        | SAGBEJ <sup>48</sup>         | -                                          |
| glutaric acid                                                            | SIHQOR <sup>39,g,h</sup>     | Solubility and dissolution rate            |
| malonic acid                                                             | SIHRAE <sup>39,g</sup>       | Solubility and dissolution rate            |
| malonic acid                                                             | SIHRAE01 <sup>49,k</sup>     | -                                          |
| Sinapic acid                                                             | TIHSAH <sup>44,i</sup>       | -                                          |
| 4-aminosalicylic acid                                                    | URUGIY <sup>24,g,h,i</sup>   | -                                          |
| oxalic acid                                                              | UZODUK <sup>50,g,h,i</sup>   | -                                          |
| 2-(3,4-dihydroxyphenyl)-3,5,7-trihydroxy-4H-1-benzopyran-4-one           | VIHJII <sup>51,i</sup>       | Solubility and dissolution                 |
| Glutaric acid                                                            | VOLROG <sup>52,g,h,i</sup>   | -                                          |
| 4-aminobenzoic acid                                                      | VUTNAB <sup>53,k</sup>       | -                                          |
| 1,4-dibromo-2,3,5,6-tetrafluorobenzene                                   | WEDXOV <sup>54,i</sup>       | -                                          |
| 1,2,4,5-tetrafluoro-3,6-diiodobenzene                                    | WEDXUB <sup>54,i</sup>       | -                                          |
| 2,5-dihydroxybenzoic acid                                                | XAQQOW <sup>55</sup>         | -                                          |
| (E)-2-cyano-3-(3,4-dihydroxy-5-nitrophenyl)-N,N-diethylprop-2-enamide    | XIPPAQ <sup>56</sup>         | Solubility, dissolution rate and stability |

|                                           |                          |                                                   |
|-------------------------------------------|--------------------------|---------------------------------------------------|
| 4-carbohydrazide bis(but-2-enedioic acid) | YEVBAF <sup>28,g,h</sup> | Solubility, dissolution and membrane permeability |
|-------------------------------------------|--------------------------|---------------------------------------------------|

g = synthon type VII, h = synthon type VIII, i = synthon type IX, j = synthon type X, k = synthon type XI

## References

- 1 L. F. Diniz, M. S. Souza, P. S. Carvalho, C. C. P. da Silva, R. F. D'Vries and J. Ellena, *J. Mol. Struct.*, 2018, **1153**, 58–68.
- 2 S. Aitipamula, A. B. H. Wong, P. S. Chow and R. B. H. Tan, *CrystEngComm*, 2013, **15**, 5877–5887.
- 3 X. G. Meng, Y. L. Xiao, H. Zhang and C. S. Zhou, *Acta Crystallogr. Sect. C Cryst. Struct. Commun.*, 2008, **64**, 261–263.
- 4 Y. Luo, D. Wu, W. Song, S. Ge and B. Sun, 2014, 5319–5330.
- 5 S. M. A. Mashhadi, U. Yunus, M. H. Bhatti and M. N. Tahir, *J. Mol. Struct.*, 2014, **1076**, 446–452.
- 6 K. K. Sarmah, T. Rajbongshi, A. Bhuyan and R. Thakuria, *Chem. Commun.*, 2019, **55**, 10900–10903.
- 7 B. Yadav, A. Gunnam, R. Thipparaboina, A. K. Nangia and N. R. Shastri, *Cryst. Growth Des.*, 2019, **19**, 5161–5172.
- 8 S. P. Gopi, M. Banik and G. R. Desiraju, *Cryst. Growth Des.*, 2017, **17**, 308–316.
- 9 S. M. A. Mashhadi, U. Yunus, M. H. Bhatti, I. Ahmed and M. N. Tahir, *J. Mol. Struct.*, 2016, **1117**, 17–21.
- 10 A. Lemmerer, J. Bernstein and V. Kahlenberg, *CrystEngComm*, 2010, **12**, 2856–2864.
- 11 A. Lemmerer, *CrystEngComm*, 2012, **14**, 2465–2478.
- 12 S. Cherukuvada and A. Nangia, *CrystEngComm*, 2012, **14**, 2579–2588.
- 13 I. Sarceviča, A. Kons and L. Orola, *CrystEngComm*, 2016, **18**, 1625–1635.
- 14 B. Swapna, D. Maddileti and A. Nangia, *Cryst. Growth Des.*, 2014, **14**, 5991–6005.
- 15 L. G. Madeley, D. C. Levendis and A. Lemmerer, *Acta Crystallogr. Sect. C Struct. Chem.*, 2019, **75**, 200–207.
- 16 R. Kaur, S. S. R. R. Perumal, A. J. Bhattacharyya, S. Yashonath and T. N. Guru Row, *Cryst. Growth Des.*, 2014, **14**, 423–426.
- 17 A. S. Kamalakaran, *J. Struct. Chem.*, 2018, **59**, 1518–1533.
- 18 M. Oruganti, P. Khade, U. K. Das and D. R. Trivedi, *RSC Adv.*, 2016, **6**, 15868–15876.
- 19 A. Lemmerer, J. Bernstein and V. Kahlenberg, *J. Chem. Crystallogr.*, 2011, **41**, 991–997.
- 20 N. Ravikumar, G. Gaddamanugu and K. Anand Solomon, *J. Mol. Struct.*, 2013, **1033**, 272–279.
- 21 M. S. Souza, L. F. Diniz, L. Vogt, P. S. Carvalho, R. F. D'Vries and J. Ellena, *Cryst.*

- Growth Des.*, 2018, **18**, 5202–5209.
- 22 L. F. Diniz, M. S. Souza, P. S. Carvalho, C. C. Correa and J. Ellena, *J. Mol. Struct.*, 2018, **1171**, 223–232.
- 23 I. Sarcevic, L. Orola, M. V. Veidis, A. Podjava and S. Belyakov, *Cryst. Growth Des.*, 2013, **13**, 1082–1090.
- 24 P. Grobelny, A. Mukherjee and G. R. Desiraju, *CrystEngComm*, 2011, **13**, 4358–4364.
- 25 T. J. Chiya and A. Lemmerer, *CrystEngComm*, 2012, **14**, 5124–5127.
- 26 M. S. Cunha, C. E. P. Ribeiro, C. C. Corrêa and R. Diniz, *J. Mol. Struct.*, 2017, **1150**, 586–594.
- 27 J. Rosa, T. C. Machado, A. K. Da Silva, G. Kuminek, A. J. Bortolluzzi, T. Caon and S. G. Cardoso, *Cryst. Growth Des.*, 2019, **19**, 5029–5036.
- 28 F. Liu, Y. Song, Y. N. Liu, Y. T. Li, Z. Y. Wu and C. W. Yan, *Cryst. Growth Des.*, 2018, **18**, 1283–1286.
- 29 Z. Y. Xie, *Acta Crystallogr. Sect. E Struct. Reports Online*, 2007, **63**, 7–13.
- 30 S. M. A. Mashhadi, D. Yufit, H. Liu, P. Hodgkinson and U. Yunus, *J. Mol. Struct.*, 2020, **1219**, 1–8.
- 31 K. K. Sarmah, T. Rajbongshi, S. Bhowmick and R. Thakuria, *Acta Crystallogr. Sect. B Struct. Sci. Cryst. Eng. Mater.*, 2017, **73**, 1007–1016.
- 32 C. B. Aakeröy, J. Desper and B. A. Helfrich, *CrystEngComm*, 2004, **6**, 19–24.
- 33 H. Abourahma, D. S. Cocuzza, J. Melendez and J. M. Urban, *CrystEngComm*, 2011, **13**, 6442–6450.
- 34 J. R. Wang, C. Ye and X. Mei, *CrystEngComm*, 2014, **16**, 6996–7003.
- 35 S. Ranjan, R. Devarapalli, S. Kundu, V. R. Vangala, A. Ghosh and C. M. Reddy, *J. Mol. Struct.*, 2017, **1133**, 405–410.
- 36 R. Thakuria, S. Cherukuvada and A. Nangia, *Cryst. Growth Des.*, 2012, **12**, 3944–3953.
- 37 P. Sanphui, N. J. Babu and A. Nangia, *Cryst. Growth Des.*, 2013, **13**, 2208–2219.
- 38 J. R. Wang, C. Ye, B. Zhu, C. Zhou and X. Mei, *CrystEngComm*, 2015, **17**, 747–752.
- 39 Y. H. Luo and B. W. Sun, *Cryst. Growth Des.*, 2013, **13**, 2098–2106.
- 40 H. Abourahma, D. D. Shah, J. Melendez, E. J. Johnson and K. T. Holman, *Cryst. Growth Des.*, 2015, **15**, 3101–3104.
- 41 K. N. Jarzemska, A. A. Hoser, S. Varughese, R. Kamiński, M. Malinska, M. Stachowicz, V. R. Pedireddi and K. Woźniak, *Cryst. Growth Des.*, 2017, **17**, 4918–4931.
- 42 T. Aree and N. Chaichit, *Supramol. Chem.*, 2009, **21**, 384–393.
- 43 M. Lou, S. H. Mao, Y. H. Luo, P. Zhao and B. W. Sun, *Res. Chem. Intermed.*, 2015, **41**, 2939–2951.
- 44 T. Rajbongshi, K. K. Sarmah, A. Sarkar, R. Ganduri, S. Cherukuvada, T. S. Thakur and R. Thakuria, *Cryst. Growth Des.*, 2018, **18**, 6640–6651.

- 45 U. Korkmaz, I. Uçar, A. Bulut and O. Büyükgüngör, *Struct. Chem.*, 2011, **22**, 1249–1259.
- 46 M. D. Eddleston, M. Arhangelskis, L. Fábíán, G. J. Tizzard, S. J. Coles and W. Jones, *Cryst. Growth Des.*, 2016, **16**, 51–58.
- 47 T. K. Adalder, R. Sankolli and P. Dastidar, *Cryst. Growth Des.*, 2012, **12**, 2533–2542.
- 48 J. K. Harper, G. Strobel and A. M. Arif, *Acta Crystallogr. Sect. E Struct. Reports Online*, , DOI:10.1107/S1600536811052457.
- 49 H. Kulla, S. Greiser, S. Benemann, K. Rademann and F. Emmerling, *Cryst. Growth Des.*, 2017, **17**, 1190–1196.
- 50 H. Kulla, S. Greiser, S. Benemann, K. Rademann and F. Emmerling, *Molecules*, 2016, **21**, 16–18.
- 51 F. Liu, L. Y. Wang, Y. T. Li, Z. Y. Wu and C. W. Yan, *Cryst. Growth Des.*, 2018, **18**, 3729–3733.
- 52 H. Kulla, A. A. L. Michalchuk and F. Emmerling, *Chem. Commun.*, 2019, **55**, 9793–9796.
- 53 S. H. Thorat, S. K. Sahu and R. G. Gonnade, *Acta Crystallogr. Sect. C Struct. Chem.*, 2015, **71**, 1010–1016.
- 54 D. Choquesillo-Lazarte, V. Nemeč and D. Cinčić, *CrystEngComm*, 2017, **19**, 5293–5299.
- 55 J. A. McMahon, J. A. Bis, P. Vishweshwar, T. R. Shattock, O. L. McLaughlin and M. J. Zaworotko, *Zeitschrift für Krist.*, 2005, **220**, 340–350.
- 56 M. K. Bommaka, M. K. Chaitanya Mannava, K. Suresh, A. Gunnam and A. Nangia, *Cryst. Growth Des.*, 2018, **18**, 6061–6069.
